# Supplementary material for: Improving emotional and psychosexual well-being screening in women living with polycystic ovary syndrome: experiences from the United Kingdom and India
Source: PubMed Central journal article supplement — Endocr Connect. 2023 Sep 27;12(11):e230179. doi: 10.1530/EC-23-0179 (PMC10563596; doi:10.1530/ec-23-0179), 2023-09-27
Supplement: supplementary_tables.pdf [file supplementary_tables.pdf]

**Supplementary Table 1:** Validated questionnaire scores based on white and non-white ethnicities.

Linear regression model, adjusted for age category, level of education, marital status and parity.

|                       | White Ethnicity<br>(n=17)<br>(Reference) | Non-white Ethnicity<br>(n=98) | Adjusted coefficient<br>(95% CI) | p-value |
|-----------------------|------------------------------------------|-------------------------------|----------------------------------|---------|
| HADS Anxiety score    | 11 (8-12) <sup>†</sup>                   | 11 (8-14) <sup>†</sup>        | 1.189 (-1.994 - 4.371)           | 0.460   |
| HADS Depression score | 3 (2.5-8) <sup>†</sup>                   | 7 (4-10) <sup>†</sup>         | 1.429 (-1.340- 4.198)            | 0.308   |
| BICI                  | 71 (55.5-82.5) <sup>†</sup>              | 56 (42-74) <sup>†</sup>       | -6.873 (-20.538-6.791)           | 0.320   |
| BAOP                  | 16.5 (13.5-19.8) <sup>†</sup>            | 15 (12.5-17.5) <sup>†</sup>   | -1.113 (-4.053-1.827)            | 0.453   |
| FSFI Overall          | 23.2 (11.8-26.5) <sup>†</sup>            | 18.5 (6.9-24.9) <sup>†</sup>  | -0.881 (-7.316- 5.554)           | 0.786   |
| FSFI Desire           | 2.7 (1.95-3.6) <sup>†</sup>              | 3.6 (2.4-3.9) <sup>†</sup>    | 0.171 (-0.623-0.966)             | 0.668   |
| FSFI Arousal          | 3.5 (1.8-4.2) <sup>†</sup>               | 3.3 (0.0-4.2) <sup>†</sup>    | -0.369 (-1.726- 0.989)           | 0.590   |
| FSFI Lubrication      | 4.7 (3.2-5.9) <sup>†</sup>               | 3.6 (0.0-5.1) <sup>†</sup>    | -0.178 (-1.905- 1.549)           | 0.838   |
| FSFI Orgasm           | 4.0 (1.5-5.5) <sup>†</sup>               | 2.8 (0.0-5.0) <sup>†</sup>    | -0.320 (-1.990- 1.350)           | 0.703   |
| FSFI Satisfaction     | 3.4 (1.7-5.1) <sup>†</sup>               | 3.6 (2.0-4.8) <sup>†</sup>    | 0.460 (0-.671- 1.592)            | 0.420   |
| FSFI Pain             | 4.4 (2.5-6) <sup>†</sup>                 | 0.0 (0.0-4.2) <sup>†</sup>    | -0.646 (-2.070- 0.778)           | 0.369   |

<sup>†</sup> Median (IQR); <sup>‡</sup> Frequency, n (%), HADS- Hospital Anxiety and Depression Scale, BICI- Body Image Concern Inventory, BAOP- Belief About Obese Persons, FSFI- Female Sexual Function Index.

**Supplementary Table 2:** *Diagnoses of Anxiety and Depression (based on hospital anxiety and depression scores) and body dysmorphic disorder (based on body image concern inventory) in people with polycystic ovary syndrome of white and non-white ethnicities. Logistic regression model, adjusted for age category, level of education, marital status and parity.*

|                          | <b>White Ethnicity</b><br>(n=17) (Reference) | <b>Non-white Ethnicity</b> (n=98) | <b>Adjusted Odds Ratio</b><br>(95% CI) | <b>p-value</b> |
|--------------------------|----------------------------------------------|-----------------------------------|----------------------------------------|----------------|
| Anxiety                  | 9 (52.9%)                                    | 56 (57.1%)                        | 8.158 (0.945 - 70.461)                 | 0.056          |
| Depression               | 1 (5.9 %)                                    | 18 (18.4%)                        | 4.324 (0.291- 64.158)                  | 0.287          |
| Body Dysmorphic Disorder | 7 (41.2%)                                    | 27 (27.6%)                        | 0.486 (0.066- 3.568)                   | 0.478          |
